# Supplementary material for: Diabetes in Non-Hispanic White Youth
Source: Oxford University Press journal article supplement (doi:10.2337/dc09-s202), 2009-02-26
Supplement: dc09s202-sup-dc09-s207.pdf [file dc09s202-sup-dc09-s207.pdf]

**Prevalence Rates (Index Year 2001) of Type 1 and Type 2 Diabetes Among Non-Hispanic White Youth by Age<sup>±</sup> and Gender: The SEARCH for Diabetes in Youth Study**

|                                                       | Clinical Type 1 DM   |                      |                      |                      |                      |                      |                      |                      |                      |                      |                      |                      |
|-------------------------------------------------------|----------------------|----------------------|----------------------|----------------------|----------------------|----------------------|----------------------|----------------------|----------------------|----------------------|----------------------|----------------------|
|                                                       | 0-4 years            |                      |                      | 5-9 years            |                      |                      | 10-14 years          |                      |                      | 15-19 years          |                      |                      |
|                                                       | M                    | F                    | All                  |
| <b>Denominator</b>                                    | 240349               | 228776               | 469125               | 256693               | 243203               | 499896               | 276973               | 262591               | 539564               | 263970               | 252871               | 516841               |
| <b>Cases</b>                                          | 98                   | 82                   | 180                  | 422                  | 395                  | 817                  | 704                  | 680                  | 1384                 | 876                  | 788                  | 1664                 |
| <b>Prevalence (per 1000)<br/>(95% CI<sup>†</sup>)</b> | 0.41<br>(0.33, 0.50) | 0.36<br>(0.29, 0.44) | 0.38<br>(0.33, 0.44) | 1.64<br>(1.49, 1.81) | 1.63<br>(1.47, 1.79) | 1.63<br>(1.53, 1.75) | 2.54<br>(2.36, 2.74) | 2.59<br>(2.40, 2.79) | 2.56<br>(2.43, 2.70) | 3.32<br>(3.11, 3.55) | 3.12<br>(2.91, 3.34) | 3.22<br>(3.07, 3.38) |

|                                                       | Clinical Type 1 DM   |                      |                      |                      |                      |                      |
|-------------------------------------------------------|----------------------|----------------------|----------------------|----------------------|----------------------|----------------------|
|                                                       | 0-9 years            |                      |                      | 10-19 years          |                      |                      |
|                                                       | M                    | F                    | All                  | M                    | F                    | All                  |
| <b>Denominator</b>                                    | 497042               | 471979               | 969021               | 540943               | 515462               | 1056405              |
| <b>Cases</b>                                          | 520                  | 477                  | 997                  | 1580                 | 1468                 | 3048                 |
| <b>Prevalence (per 1000)<br/>(95% CI<sup>†</sup>)</b> | 1.05<br>(0.96, 1.14) | 1.01<br>(0.92, 1.11) | 1.03<br>(0.97, 1.09) | 2.92<br>(2.78, 3.07) | 2.85<br>(2.71, 3.00) | 2.89<br>(2.78, 2.99) |

|                                                       | Clinical Type 2 DM   |                      |                      |                      |                      |                      |                      |                      |                      |
|-------------------------------------------------------|----------------------|----------------------|----------------------|----------------------|----------------------|----------------------|----------------------|----------------------|----------------------|
|                                                       | 10-14 years          |                      |                      | 15-19 years          |                      |                      | 10-19 years          |                      |                      |
|                                                       | M                    | F                    | All                  | M                    | F                    | All                  | M                    | F                    | All                  |
| <b>Denominator</b>                                    | 276973               | 262591               | 539564               | 263970               | 252871               | 516841               | 540943               | 515462               | 1056405              |
| <b>Cases</b>                                          | 15                   | 30                   | 45                   | 67                   | 82                   | 149                  | 82                   | 112                  | 194                  |
| <b>Prevalence (per 1000)<br/>(95% CI<sup>†</sup>)</b> | 0.05<br>(0.03, 0.09) | 0.11<br>(0.08, 0.16) | 0.08<br>(0.06, 0.11) | 0.25<br>(0.20, 0.32) | 0.33<br>(0.26, 0.40) | 0.29<br>(0.25, 0.34) | 0.15<br>(0.12, 0.19) | 0.22<br>(0.18, 0.26) | 0.18<br>(0.16, 0.21) |

\*4 cases of T2DM in youth under age 10yrs with Prevalence (per 1000) of 0.0046(0.0019, 0.0113).

<sup>±</sup>Age in the year 2001

<sup>†</sup>Confidence Intervals calculated using an inverted score test from the binomial distribution

**Incidence Rates (Incident Years 2002-2005) of Type 1 and Type 2 Diabetes Among Non-Hispanic White Youth by Age<sup>±</sup> and Gender: The SEARCH for Diabetes in Youth Study**

|                                                         | Clinical Type 1 DM   |                      |                      |                      |                      |                      |                      |                      |                      |                      |                     |                      |
|---------------------------------------------------------|----------------------|----------------------|----------------------|----------------------|----------------------|----------------------|----------------------|----------------------|----------------------|----------------------|---------------------|----------------------|
|                                                         | 0-4 years            |                      |                      | 5-9 years            |                      |                      | 10-14 years          |                      |                      | 15-19 years          |                     |                      |
|                                                         | M                    | F                    | All                  | M                    | F                    | All                  | M                    | F                    | All                  | M                    | F                   | All                  |
| <b>Denominator</b>                                      | 1425238              | 1360113              | 2785351              | 1468802              | 1388150              | 2856952              | 1617469              | 1532950              | 3150420              | 1565506              | 1498572             | 3064077              |
| <b>Cases</b>                                            | 275                  | 265                  | 540                  | 408                  | 451                  | 859                  | 590                  | 446                  | 1036                 | 215                  | 150                 | 365                  |
| <b>Incidence (per 100,000)<br/>(95% CI<sup>†</sup>)</b> | 19.3<br>(17.2, 21.7) | 19.5<br>(17.3, 22.0) | 19.4<br>(17.8, 21.1) | 27.8<br>(25.3, 30.7) | 32.5<br>(29.6, 35.6) | 30.1<br>(28.1, 32.2) | 36.5<br>(33.6, 39.5) | 29.1<br>(26.6, 32.0) | 32.9<br>(30.9, 35.0) | 13.8<br>(12.0, 15.7) | 10.0<br>(8.5, 11.8) | 11.9<br>(10.8, 13.2) |

|                                                         | Clinical Type 1 DM   |                      |                      |                      |                      |                      |
|---------------------------------------------------------|----------------------|----------------------|----------------------|----------------------|----------------------|----------------------|
|                                                         | 0-9 years            |                      |                      | 10-19 years          |                      |                      |
|                                                         | M                    | F                    | All                  | M                    | F                    | All                  |
| <b>Denominator</b>                                      | 2894040              | 2748263              | 5642303              | 3182975              | 3031522              | 6214497              |
| <b>Cases</b>                                            | 683                  | 716                  | 1399                 | 805                  | 596                  | 1401                 |
| <b>Incidence (per 100,000)<br/>(95% CI<sup>†</sup>)</b> | 23.6<br>(21.9, 25.5) | 26.0<br>(24.2, 28.0) | 24.8<br>(23.5, 26.1) | 25.3<br>(23.6, 27.1) | 19.7<br>(18.2, 21.3) | 22.6<br>(21.4, 23.8) |

|                                                         | Clinical Type 2 DM |                   |                   |                   |                   |                   |                   |                   |                   |
|---------------------------------------------------------|--------------------|-------------------|-------------------|-------------------|-------------------|-------------------|-------------------|-------------------|-------------------|
|                                                         | 10-14 years        |                   |                   | 15-19 years       |                   |                   | 10-19 years       |                   |                   |
|                                                         | M                  | F                 | All               | M                 | F                 | All               | M                 | F                 | All               |
| <b>Denominator</b>                                      | 1617469            | 1532950           | 3150420           | 1565506           | 1498572           | 3064077           | 3182975           | 3031522           | 6214497           |
| <b>Cases</b>                                            | 49                 | 55                | 104               | 61                | 64                | 125               | 110               | 119               | 229               |
| <b>Incidence (per 100,000)<br/>(95% CI<sup>†</sup>)</b> | 3.0<br>(2.3, 4.0)  | 3.6<br>(2.8, 4.7) | 3.3<br>(2.7, 4.0) | 3.9<br>(3.0, 5.0) | 4.3<br>(3.4, 5.5) | 4.1<br>(3.4, 4.9) | 3.4<br>(2.9, 4.1) | 3.9<br>(3.3, 4.7) | 3.7<br>(3.2, 4.2) |

\*12 cases of T2DM in youth under age 10yrs with Incidence (per 100,000) of 0.2(0.1, 0.4).

<sup>±</sup>Age is at the time of diagnosis

<sup>†</sup>Confidence Intervals calculated using an inverted score test from the binomial distribution

**Prevalence Rates (Index Year 2001) of Type 1 and Type 2 Diabetes Among African American Youth by Age<sup>±</sup> and Gender: The SEARCH for Diabetes in Youth Study**

|                                                       | Clinical Type 1 DM   |                      |                      |                      |                      |                      |                      |                      |                      |                      |                      |                      |
|-------------------------------------------------------|----------------------|----------------------|----------------------|----------------------|----------------------|----------------------|----------------------|----------------------|----------------------|----------------------|----------------------|----------------------|
|                                                       | 0-4 years            |                      |                      | 5-9 years            |                      |                      | 10-14 years          |                      |                      | 15-19 years          |                      |                      |
|                                                       | M                    | F                    | All                  |
| <b>Denominator</b>                                    | 45444                | 44047                | 89491                | 48472                | 46869                | 95341                | 50584                | 48554                | 99138                | 44930                | 44699                | 89629                |
| <b>Cases</b>                                          | 10                   | 9                    | 19                   | 41                   | 44                   | 85                   | 76                   | 102                  | 178                  | 107                  | 101                  | 208                  |
| <b>Prevalence (per 1000)<br/>(95% CI<sup>†</sup>)</b> | 0.22<br>(0.12, 0.40) | 0.22<br>(0.12, 0.40) | 0.22<br>(0.14, 0.34) | 0.85<br>(0.63, 1.15) | 0.94<br>(0.70, 1.26) | 0.90<br>(0.72, 1.11) | 1.50<br>(1.20, 1.88) | 2.10<br>(1.73, 2.54) | 1.79<br>(1.55, 2.08) | 2.38<br>(1.97, 2.87) | 2.26<br>(1.86, 2.75) | 2.32<br>(2.02, 2.66) |

|                                                       | Clinical Type 1 DM   |                      |                      |                      |                      |                      |
|-------------------------------------------------------|----------------------|----------------------|----------------------|----------------------|----------------------|----------------------|
|                                                       | 0-9 years            |                      |                      | 10-19 years          |                      |                      |
|                                                       | M                    | F                    | All                  | M                    | F                    | All                  |
| <b>Denominator</b>                                    | 93916                | 90916                | 184832               | 95514                | 93253                | 188767               |
| <b>Cases</b>                                          | 51                   | 53                   | 104                  | 183                  | 203                  | 386                  |
| <b>Prevalence (per 1000)<br/>(95% CI<sup>†</sup>)</b> | 0.54<br>(0.41, 0.71) | 0.59<br>(0.45, 0.77) | 0.57<br>(0.47, 0.69) | 1.91<br>(1.66, 2.21) | 2.17<br>(1.90, 2.49) | 2.04<br>(1.85, 2.26) |

|                                                       | Clinical Type 2 DM   |                      |                      |                      |                      |                      |                      |                      |                      |
|-------------------------------------------------------|----------------------|----------------------|----------------------|----------------------|----------------------|----------------------|----------------------|----------------------|----------------------|
|                                                       | 10-14 years          |                      |                      | 15-19 years          |                      |                      | 10-19 years          |                      |                      |
|                                                       | M                    | F                    | All                  | M                    | F                    | All                  | M                    | F                    | All                  |
| <b>Denominator</b>                                    | 50584                | 48554                | 99138                | 44930                | 44699                | 89629                | 95514                | 93253                | 188767               |
| <b>Cases</b>                                          | 9                    | 30                   | 39                   | 55                   | 107                  | 162                  | 64                   | 137                  | 201                  |
| <b>Prevalence (per 1000)<br/>(95% CI<sup>†</sup>)</b> | 0.17<br>(0.09, 0.33) | 0.61<br>(0.43, 0.87) | 0.39<br>(0.28, 0.53) | 1.23<br>(0.95, 1.60) | 2.40<br>(1.99, 2.90) | 1.81<br>(1.56, 2.12) | 0.67<br>(0.53, 0.86) | 1.47<br>(1.24, 1.73) | 1.06<br>(0.93, 1.22) |

\*1 case of T2DM in youth under age 10yrs with Prevalence (per 1000) of 0.0005(0.0000, 0.0218).

<sup>±</sup>Age in the year 2001

<sup>†</sup>Confidence Intervals calculated using an inverted score test from the binomial distribution

**Incidence Rates (Incident Years 2002-2005) of Type 1 and Type 2 Diabetes Among African American Youth by Age<sup>±</sup> and Gender: The SEARCH for Diabetes in Youth Study**

|                                                         | Clinical Type 1 DM  |                     |                     |                      |                      |                      |                      |                      |                      |                    |                    |                    |
|---------------------------------------------------------|---------------------|---------------------|---------------------|----------------------|----------------------|----------------------|----------------------|----------------------|----------------------|--------------------|--------------------|--------------------|
|                                                         | 0-4 years           |                     |                     | 5-9 years            |                      |                      | 10-14 years          |                      |                      | 15-19 years        |                    |                    |
|                                                         | M                   | F                   | All                 | M                    | F                    | All                  | M                    | F                    | All                  | M                  | F                  | All                |
| <b>Denominator</b>                                      | 350020              | 336990              | 687010              | 353380               | 342388               | 695768               | 395986               | 382555               | 778541               | 354455             | 353725             | 708181             |
| <b>Cases</b>                                            | 41                  | 41                  | 82                  | 63                   | 72                   | 135                  | 66                   | 100                  | 166                  | 33                 | 34                 | 67                 |
| <b>Incidence (per 100,000)<br/>(95% CI<sup>†</sup>)</b> | 11.9<br>(8.8, 16.0) | 12.1<br>(8.9, 16.4) | 12.0<br>(9.6, 14.8) | 17.8<br>(14.0, 22.8) | 20.9<br>(16.6, 26.3) | 19.3<br>(16.3, 22.9) | 16.7<br>(13.1, 21.2) | 26.1<br>(21.5, 31.8) | 21.3<br>(18.3, 24.8) | 9.3<br>(6.7, 13.1) | 9.6<br>(6.8, 13.4) | 9.5<br>(7.4, 12.0) |

|                                                         | Clinical Type 1 DM   |                      |                      |                      |                      |                      |
|---------------------------------------------------------|----------------------|----------------------|----------------------|----------------------|----------------------|----------------------|
|                                                         | 0-9 years            |                      |                      | 10-19 years          |                      |                      |
|                                                         | M                    | F                    | All                  | M                    | F                    | All                  |
| <b>Denominator</b>                                      | 703401               | 679378               | 1382778              | 750442               | 736280               | 1486721              |
| <b>Cases</b>                                            | 104                  | 113                  | 217                  | 99                   | 134                  | 233                  |
| <b>Incidence (per 100,000)<br/>(95% CI<sup>†</sup>)</b> | 14.9<br>(12.3, 18.0) | 16.5<br>(13.7, 19.9) | 15.7<br>(13.7, 17.9) | 13.2<br>(10.9, 16.1) | 18.2<br>(15.4, 21.5) | 15.7<br>(13.8, 17.8) |

|                                                         | Clinical Type 2 DM  |                      |                      |                      |                      |                      |                      |                      |                      |
|---------------------------------------------------------|---------------------|----------------------|----------------------|----------------------|----------------------|----------------------|----------------------|----------------------|----------------------|
|                                                         | 10-14 years         |                      |                      | 15-19 years          |                      |                      | 10-19 years          |                      |                      |
|                                                         | M                   | F                    | All                  | M                    | F                    | All                  | M                    | F                    | All                  |
| <b>Denominator</b>                                      | 395986              | 382555               | 778541               | 354455               | 353725               | 708181               | 750442               | 736280               | 1486721              |
| <b>Cases</b>                                            | 48                  | 114                  | 162                  | 49                   | 71                   | 120                  | 97                   | 185                  | 282                  |
| <b>Incidence (per 100,000)<br/>(95% CI<sup>†</sup>)</b> | 12.2<br>(9.2, 16.1) | 29.8<br>(24.8, 35.8) | 20.8<br>(17.9, 24.3) | 13.8<br>(10.5, 18.3) | 20.1<br>(16.0, 25.4) | 17.0<br>(14.2, 20.3) | 13.0<br>(10.6, 15.8) | 25.1<br>(21.8, 29.0) | 19.0<br>(16.9, 21.3) |

\*16 cases of T2DM in youth under age 10yrs with Incidence (per 100,000) of 1.1(0.7, 1.9).

<sup>±</sup>Age is at the time of diagnosis

<sup>†</sup>Confidence Intervals calculated using an inverted score test from the binomial distribution

**Prevalence Rates (Index Year 2001) of Type 1 and Type 2 Diabetes Among Hispanic Youth by Age<sup>‡</sup> and Gender: The SEARCH for Diabetes in Youth Study**

|                                                       | Clinical Type 1 DM   |                      |                      |                      |                      |                      |                      |                      |                      |                      |                      |                      |
|-------------------------------------------------------|----------------------|----------------------|----------------------|----------------------|----------------------|----------------------|----------------------|----------------------|----------------------|----------------------|----------------------|----------------------|
|                                                       | 0-4 years            |                      |                      | 5-9 years            |                      |                      | 10-14 years          |                      |                      | 15-19 years          |                      |                      |
|                                                       | M                    | F                    | All                  |
| <b>Denominator</b>                                    | 83629                | 80277                | 163906               | 84913                | 81664                | 166577               | 83727                | 80324                | 164051               | 75137                | 71743                | 146880               |
| <b>Cases</b>                                          | 15                   | 13                   | 28                   | 55                   | 62                   | 117                  | 119                  | 123                  | 242                  | 134                  | 117                  | 251                  |
| <b>Prevalence (per 1000)<br/>(95% CI<sup>†</sup>)</b> | 0.18<br>(0.11, 0.30) | 0.16<br>(0.09, 0.28) | 0.17<br>(0.12, 0.25) | 0.65<br>(0.50, 0.84) | 0.76<br>(0.59, 0.97) | 0.70<br>(0.59, 0.84) | 1.42<br>(1.18, 1.69) | 1.53<br>(1.28, 1.83) | 1.47<br>(1.30, 1.67) | 1.78<br>(1.51, 2.11) | 1.64<br>(1.37, 1.96) | 1.71<br>(1.51, 1.94) |

|                                                       | Clinical Type 1 DM   |                      |                      |                      |                      |                      |
|-------------------------------------------------------|----------------------|----------------------|----------------------|----------------------|----------------------|----------------------|
|                                                       | 0-9 years            |                      |                      | 10-19 years          |                      |                      |
|                                                       | M                    | F                    | All                  | M                    | F                    | All                  |
| <b>Denominator</b>                                    | 168542               | 161941               | 330483               | 158864               | 152067               | 310931               |
| <b>Cases</b>                                          | 70                   | 75                   | 145                  | 253                  | 240                  | 493                  |
| <b>Prevalence (per 1000)<br/>(95% CI<sup>†</sup>)</b> | 0.42<br>(0.33, 0.52) | 0.46<br>(0.37, 0.58) | 0.44<br>(0.37, 0.52) | 1.59<br>(1.41, 1.80) | 1.58<br>(1.39, 1.79) | 1.59<br>(1.45, 1.73) |

|                                                       | Clinical Type 2 DM   |                      |                      |                      |                      |                      |                      |                      |                      |
|-------------------------------------------------------|----------------------|----------------------|----------------------|----------------------|----------------------|----------------------|----------------------|----------------------|----------------------|
|                                                       | 10-14 years          |                      |                      | 15-19 years          |                      |                      | 10-19 years          |                      |                      |
|                                                       | M                    | F                    | All                  | M                    | F                    | All                  | M                    | F                    | All                  |
| <b>Denominator</b>                                    | 83727                | 80324                | 164051               | 75137                | 71743                | 146880               | 158864               | 152067               | 310931               |
| <b>Cases</b>                                          | 17                   | 24                   | 41                   | 46                   | 55                   | 101                  | 63                   | 79                   | 142                  |
| <b>Prevalence (per 1000)<br/>(95% CI<sup>†</sup>)</b> | 0.20<br>(0.13, 0.33) | 0.30<br>(0.20, 0.44) | 0.25<br>(0.18, 0.34) | 0.63<br>(0.47, 0.83) | 0.77<br>(0.59, 1.00) | 0.69<br>(0.57, 0.84) | 0.40<br>(0.32, 0.51) | 0.52<br>(0.42, 0.65) | 0.46<br>(0.39, 0.54) |

\*1 case of T2DM in youth under age 10yrs with Prevalence (per 1000) of 0.0003(0.0005, 0.017).

<sup>‡</sup>Age in the year 2001

<sup>†</sup>Confidence Intervals calculated using an inverted score test from the binomial distribution

**Incidence Rates (Incident Years 2002-2005) of Type 1 and Type 2 Diabetes Among Hispanic Youth by Age<sup>±</sup> and Gender: The SEARCH for Diabetes in Youth Study**

|                                                         | Clinical Type 1 DM  |                    |                     |                      |                      |                      |                      |                      |                      |                     |                    |                    |
|---------------------------------------------------------|---------------------|--------------------|---------------------|----------------------|----------------------|----------------------|----------------------|----------------------|----------------------|---------------------|--------------------|--------------------|
|                                                         | 0-4 years           |                    |                     | 5-9 years            |                      |                      | 10-14 years          |                      |                      | 15-19 years         |                    |                    |
|                                                         | M                   | F                  | All                 | M                    | F                    | All                  | M                    | F                    | All                  | M                   | F                  | All                |
| <b>Denominator</b>                                      | 428925              | 410460             | 839385              | 420668               | 398567               | 819235               | 418811               | 402934               | 821745               | 371430              | 355210             | 726639             |
| <b>Cases</b>                                            | 48                  | 37                 | 85                  | 69                   | 80                   | 149                  | 88                   | 63                   | 151                  | 37                  | 26                 | 63                 |
| <b>Incidence (per 100,000)<br/>(95% CI<sup>†</sup>)</b> | 11.2<br>(8.5, 14.9) | 9.1<br>(6.6, 12.5) | 10.2<br>(8.3, 12.6) | 16.3<br>(12.9, 20.7) | 20.1<br>(16.2, 25.0) | 18.2<br>(15.5, 21.3) | 20.9<br>(17.0, 25.8) | 15.7<br>(12.3, 20.1) | 18.4<br>(15.6, 21.5) | 10.0<br>(7.2, 13.7) | 7.4<br>(5.0, 10.8) | 8.7<br>(6.8, 11.1) |

|                                                         | Clinical Type 1 DM   |                      |                      |                      |                     |                      |
|---------------------------------------------------------|----------------------|----------------------|----------------------|----------------------|---------------------|----------------------|
|                                                         | 0-9 years            |                      |                      | 10-19 years          |                     |                      |
|                                                         | M                    | F                    | All                  | M                    | F                   | All                  |
| <b>Denominator</b>                                      | 849593               | 809027               | 1658620              | 790241               | 758144              | 1548385              |
| <b>Cases</b>                                            | 117                  | 117                  | 234                  | 125                  | 89                  | 214                  |
| <b>Incidence (per 100,000)<br/>(95% CI<sup>†</sup>)</b> | 13.8<br>(11.5, 16.5) | 14.5<br>(12.1, 17.4) | 14.1<br>(12.4, 16.1) | 15.8<br>(13.2, 18.8) | 11.8<br>(9.6, 14.5) | 13.8<br>(12.1, 15.8) |

|                                                         | Clinical Type 2 DM |                      |                     |                     |                     |                     |                    |                      |                      |
|---------------------------------------------------------|--------------------|----------------------|---------------------|---------------------|---------------------|---------------------|--------------------|----------------------|----------------------|
|                                                         | 10-14 years        |                      |                     | 15-19 years         |                     |                     | 10-19 years        |                      |                      |
|                                                         | M                  | F                    | All                 | M                   | F                   | All                 | M                  | F                    | All                  |
| <b>Denominator</b>                                      | 418811             | 402934               | 821745              | 371430              | 355210              | 726639              | 790241             | 758144               | 1548385              |
| <b>Cases</b>                                            | 32                 | 60                   | 92                  | 42                  | 45                  | 87                  | 74                 | 105                  | 179                  |
| <b>Incidence (per 100,000)<br/>(95% CI<sup>†</sup>)</b> | 7.6<br>(5.4, 10.7) | 14.9<br>(11.6, 19.2) | 11.2<br>(9.1, 13.7) | 11.4<br>(8.4, 15.4) | 12.6<br>(9.4, 16.9) | 12.0<br>(9.7, 14.8) | 9.4<br>(7.5, 11.8) | 13.8<br>(11.4, 16.7) | 11.6<br>(10.0, 13.4) |

\*8 cases of T2DM in youth under age 10yrs with Incidence (per 100,000) of 0.5(0.3, 1.0).

<sup>±</sup>Age is at the time of diagnosis

<sup>†</sup>Confidence Intervals calculated using an inverted score test from the binomial distribution

**Prevalence Rates (Index Year 2001) of Type 1 and Type 2 Diabetes Among Asian-Pacific Islander Youth by Age<sup>±</sup> and Gender: The SEARCH for Diabetes in Youth Study**

|                                                       | Clinical Type 1 DM   |                      |                      |                      |                      |                      |                      |                      |                      |                      |                      |                      |
|-------------------------------------------------------|----------------------|----------------------|----------------------|----------------------|----------------------|----------------------|----------------------|----------------------|----------------------|----------------------|----------------------|----------------------|
|                                                       | 0-4 years            |                      |                      | 5-9 years            |                      |                      | 10-14 years          |                      |                      | 15-19 years          |                      |                      |
|                                                       | M                    | F                    | All                  |
| <b>Denominator</b>                                    | 37997                | 37098                | 75095                | 40441                | 39363                | 79804                | 42756                | 41307                | 84063                | 41271                | 40170                | 81441                |
| <b>Cases</b>                                          | 4                    | 9                    | 13                   | 13                   | 14                   | 27                   | 20                   | 32                   | 52                   | 33                   | 42                   | 75                   |
| <b>Prevalence (per 1000)<br/>(95% CI<sup>†</sup>)</b> | 0.11<br>(0.04, 0.28) | 0.25<br>(0.13, 0.47) | 0.18<br>(0.11, 0.30) | 0.32<br>(0.19, 0.55) | 0.35<br>(0.21, 0.59) | 0.34<br>(0.23, 0.49) | 0.47<br>(0.31, 0.73) | 0.77<br>(0.55, 1.09) | 0.62<br>(0.47, 0.81) | 0.80<br>(0.57, 1.13) | 1.06<br>(0.78, 1.43) | 0.93<br>(0.74, 1.16) |

|                                                       | Clinical Type 1 DM   |                      |                      |                      |                      |                      |
|-------------------------------------------------------|----------------------|----------------------|----------------------|----------------------|----------------------|----------------------|
|                                                       | 0-9 years            |                      |                      | 10-19 years          |                      |                      |
|                                                       | M                    | F                    | All                  | M                    | F                    | All                  |
| <b>Denominator</b>                                    | 78438                | 76461                | 154899               | 84027                | 81477                | 165504               |
| <b>Cases</b>                                          | 17                   | 23                   | 40                   | 53                   | 74                   | 127                  |
| <b>Prevalence (per 1000)<br/>(95% CI<sup>†</sup>)</b> | 0.22<br>(0.14, 0.35) | 0.30<br>(0.20, 0.45) | 0.26<br>(0.19, 0.35) | 0.64<br>(0.49, 0.83) | 0.91<br>(0.73, 1.14) | 0.77<br>(0.65, 0.92) |

|                                                       | Clinical Type 2 DM   |                      |                      |                      |                      |                      |                      |                      |                      |
|-------------------------------------------------------|----------------------|----------------------|----------------------|----------------------|----------------------|----------------------|----------------------|----------------------|----------------------|
|                                                       | 10-14 years          |                      |                      | 15-19 years          |                      |                      | 10-19 years          |                      |                      |
|                                                       | M                    | F                    | All                  | M                    | F                    | All                  | M                    | F                    | All                  |
| <b>Denominator</b>                                    | 42756                | 41307                | 84063                | 41271                | 40170                | 81441                | 84027                | 81477                | 165504               |
| <b>Cases</b>                                          | 10                   | 10                   | 20                   | 32                   | 34                   | 66                   | 42                   | 44                   | 86                   |
| <b>Prevalence (per 1000)<br/>(95% CI<sup>†</sup>)</b> | 0.22<br>(0.12, 0.42) | 0.24<br>(0.13, 0.45) | 0.23<br>(0.15, 0.36) | 0.79<br>(0.56, 1.11) | 0.85<br>(0.61, 1.19) | 0.82<br>(0.64, 1.04) | 0.50<br>(0.37, 0.68) | 0.54<br>(0.40, 0.73) | 0.52<br>(0.42, 0.64) |

\*2 cases of T2DM in youth under age 10yrs with Prevalence (per 1000) of 0.014(0.0041, 0.0490).

<sup>±</sup>Age in the year 2001

<sup>†</sup>Confidence Intervals calculated using an inverted score test from the binomial distribution

**Incidence Rates (Incident Years 2002-2005) of Type 1 and Type 2 Diabetes Among Asian-Pacific Islander Youth by Age<sup>±</sup> and Gender: The SEARCH for Diabetes in Youth Study**

|                                                         | Clinical Type 1 DM |                    |                   |                    |                    |                    |                     |                    |                    |                   |                    |                   |
|---------------------------------------------------------|--------------------|--------------------|-------------------|--------------------|--------------------|--------------------|---------------------|--------------------|--------------------|-------------------|--------------------|-------------------|
|                                                         | 0-4 years          |                    |                   | 5-9 years          |                    |                    | 10-14 years         |                    |                    | 15-19 years       |                    |                   |
|                                                         | M                  | F                  | All               | M                  | F                  | All                | M                   | F                  | All                | M                 | F                  | All               |
| <b>Denominator</b>                                      | 188675             | 181925             | 370601            | 193497             | 189202             | 382698             | 210523              | 202410             | 412933             | 197351            | 196637             | 393989            |
| <b>Cases</b>                                            | 8                  | 11                 | 19                | 12                 | 17                 | 29                 | 22                  | 15                 | 37                 | 8                 | 14                 | 22                |
| <b>Incidence (per 100,000)<br/>(95% CI<sup>†</sup>)</b> | 4.1<br>(2.0, 8.1)  | 6.3<br>(3.5, 11.1) | 5.2<br>(3.3, 8.0) | 6.2<br>(3.5, 10.8) | 9.1<br>(5.7, 14.5) | 7.6<br>(5.3, 10.9) | 10.4<br>(6.9, 15.8) | 7.6<br>(4.6, 12.5) | 9.1<br>(6.6, 12.5) | 4.2<br>(2.2, 8.2) | 7.3<br>(4.4, 12.2) | 5.7<br>(3.8, 8.6) |

|                                                         | Clinical Type 1 DM |                    |                   |                    |                    |                   |
|---------------------------------------------------------|--------------------|--------------------|-------------------|--------------------|--------------------|-------------------|
|                                                         | 0-9 years          |                    |                   | 10-19 years        |                    |                   |
|                                                         | M                  | F                  | All               | M                  | F                  | All               |
| <b>Denominator</b>                                      | 382172             | 371127             | 753299            | 407874             | 399047             | 806921            |
| <b>Cases</b>                                            | 20                 | 28                 | 48                | 30                 | 29                 | 59                |
| <b>Incidence (per 100,000)<br/>(95% CI<sup>†</sup>)</b> | 5.1<br>(3.3, 8.0)  | 7.7<br>(5.3, 11.1) | 6.4<br>(4.8, 8.5) | 7.4<br>(5.2, 10.6) | 7.5<br>(5.2, 10.7) | 7.4<br>(5.8, 9.6) |

|                                                         | Clinical Type 2 DM  |                     |                     |                     |                     |                     |                     |                      |                     |
|---------------------------------------------------------|---------------------|---------------------|---------------------|---------------------|---------------------|---------------------|---------------------|----------------------|---------------------|
|                                                         | 10-14 years         |                     |                     | 15-19 years         |                     |                     | 10-19 years         |                      |                     |
|                                                         | M                   | F                   | All                 | M                   | F                   | All                 | M                   | F                    | All                 |
| <b>Denominator</b>                                      | 210523              | 202410              | 412933              | 197351              | 196637              | 393989              | 407874              | 399047               | 806921              |
| <b>Cases</b>                                            | 21                  | 27                  | 48                  | 23                  | 27                  | 50                  | 44                  | 54                   | 98                  |
| <b>Incidence (per 100,000)<br/>(95% CI<sup>†</sup>)</b> | 10.1<br>(6.7, 15.5) | 13.2<br>(9.0, 19.2) | 11.6<br>(8.8, 15.4) | 11.4<br>(7.5, 17.2) | 13.9<br>(9.6, 20.2) | 12.6<br>(9.6, 16.7) | 10.7<br>(8.0, 14.4) | 13.5<br>(10.4, 17.6) | 12.1<br>(9.9, 14.8) |

\*5 cases of T2DM in youth under age 10yrs with Incidence (per 100,000) of 0.6(0.3, 1.5).

<sup>±</sup>Age is at the time of diagnosis

<sup>†</sup>Confidence Intervals calculated using an inverted score test from the binomial distribution



**Prevalence Rates (Index Year 2001) of Type 1 and Type 2 Diabetes Among Navajo Youth by Age<sup>±</sup> and Gender: The SEARCH for Diabetes in Youth Study**

|                                                       | Clinical Type 1 DM |       |       |                      |                      |                      |                      |                      |                      |                      |                      |                      |
|-------------------------------------------------------|--------------------|-------|-------|----------------------|----------------------|----------------------|----------------------|----------------------|----------------------|----------------------|----------------------|----------------------|
|                                                       | 0-4 years          |       |       | 5-9 years            |                      |                      | 10-14 years          |                      |                      | 15-19 years          |                      |                      |
|                                                       | M                  | F     | All   | M                    | F                    | All                  | M                    | F                    | All                  | M                    | F                    | All                  |
| <b>Denominator</b>                                    | 11521              | 11234 | 22755 | 12522                | 12276                | 24798                | 13721                | 13386                | 27107                | 11574                | 11780                | 23354                |
| <b>Cases</b>                                          | 0                  | 0     | 0     | 2                    | 2                    | 4                    | 3                    | 1                    | 4                    | 5                    | 5                    | 10                   |
| <b>Prevalence (per 1000)<br/>(95% CI<sup>†</sup>)</b> | 0                  | 0     | 0     | 0.16<br>(0.04, 0.58) | 0.16<br>(0.04, 0.59) | 0.16<br>(0.06, 0.41) | 0.22<br>(0.07, 0.64) | 0.07<br>(0.01, 0.42) | 0.15<br>(0.06, 0.38) | 0.43<br>(0.18, 1.01) | 0.42<br>(0.18, 0.99) | 0.43<br>(0.23, 0.79) |

|                                                       | Clinical Type 1 DM   |                      |                      |                      |                      |                      |
|-------------------------------------------------------|----------------------|----------------------|----------------------|----------------------|----------------------|----------------------|
|                                                       | 0-9 years            |                      |                      | 10-19 years          |                      |                      |
|                                                       | M                    | F                    | All                  | M                    | F                    | All                  |
| <b>Denominator</b>                                    | 24043                | 23510                | 47553                | 25295                | 25166                | 50461                |
| <b>Cases</b>                                          | 2                    | 2                    | 4                    | 8                    | 6                    | 14                   |
| <b>Prevalence (per 1000)<br/>(95% CI<sup>†</sup>)</b> | 0.08<br>(0.02, 0.30) | 0.09<br>(0.02, 0.31) | 0.08<br>(0.03, 0.22) | 0.32<br>(0.16, 0.62) | 0.24<br>(0.11, 0.52) | 0.28<br>(0.17, 0.47) |

|                                                       | Clinical Type 2 DM   |                      |                      |                      |                      |                      |                      |                      |                      |
|-------------------------------------------------------|----------------------|----------------------|----------------------|----------------------|----------------------|----------------------|----------------------|----------------------|----------------------|
|                                                       | 10-14 years          |                      |                      | 15-19 years          |                      |                      | 10-19 years          |                      |                      |
|                                                       | M                    | F                    | All                  | M                    | F                    | All                  | M                    | F                    | All                  |
| <b>Denominator</b>                                    | 13721                | 13386                | 27107                | 11574                | 11780                | 23354                | 25295                | 25166                | 50461                |
| <b>Cases</b>                                          | 7                    | 11                   | 18                   | 24                   | 31                   | 55                   | 31                   | 42                   | 73                   |
| <b>Prevalence (per 1000)<br/>(95% CI<sup>†</sup>)</b> | 0.51<br>(0.25, 1.05) | 0.82<br>(0.46, 1.47) | 0.66<br>(0.42, 1.05) | 2.07<br>(1.39, 3.08) | 2.63<br>(1.85, 3.73) | 2.36<br>(1.81, 3.06) | 1.23<br>(0.86, 1.74) | 1.67<br>(1.23, 2.25) | 1.45<br>(1.15, 1.82) |

\*1 case of T2DM in youth under age 10yrs with Prevalence (per 1000) of 0.021(0.0037, 0.1191).

<sup>±</sup>Age in the year 2001

<sup>†</sup>Confidence Intervals calculated using an inverted score test from the binomial distribution

**Incidence Rates (Incident Years 2002-2005) of Type 1 and Type 2 Diabetes Among Navajo Youth by Age<sup>±</sup> and Gender: The SEARCH for Diabetes in Youth Study**

|                                                         | Clinical Type 1 DM |                       |                      |                       |                       |                      |                       |                       |                      |                       |                       |                       |
|---------------------------------------------------------|--------------------|-----------------------|----------------------|-----------------------|-----------------------|----------------------|-----------------------|-----------------------|----------------------|-----------------------|-----------------------|-----------------------|
|                                                         | 0-4 years          |                       |                      | 5-9 years             |                       |                      | 10-14 years           |                       |                      | 15-19 years           |                       |                       |
|                                                         | M                  | F                     | All                  | M                     | F                     | All                  | M                     | F                     | All                  | M                     | F                     | All                   |
| <b>Denominator</b>                                      | 44017              | 43251                 | 87268                | 46475                 | 45050                 | 91525                | 51587                 | 51106                 | 102693               | 49357                 | 49790                 | 99147                 |
| <b>Cases</b>                                            | 0                  | 1                     | 1                    | 2                     | 1                     | 3                    | 1                     | 1                     | 2                    | 2                     | 2                     | 4                     |
| <b>Incidence (per 100,000)<br/>(95% CI<sup>†</sup>)</b> |                    | 2.31<br>(0.41, 13.10) | 1.15<br>(0.20, 6.49) | 4.30<br>(1.18, 15.69) | 2.22<br>(0.39, 12.57) | 3.28<br>(1.11, 9.64) | 1.94<br>(0.34, 10.98) | 1.96<br>(0.35, 11.08) | 1.95<br>(0.53, 7.10) | 4.05<br>(1.11, 14.78) | 4.02<br>(1.10, 14.65) | 4.03<br>(1.57, 10.37) |

|                                                         | Clinical Type 1 DM   |                      |                      |                      |                      |                      |
|---------------------------------------------------------|----------------------|----------------------|----------------------|----------------------|----------------------|----------------------|
|                                                         | 0-9 years            |                      |                      | 10-19 years          |                      |                      |
|                                                         | M                    | F                    | All                  | M                    | F                    | All                  |
| <b>Denominator</b>                                      | 90492                | 88301                | 178793               | 100944               | 100896               | 201840               |
| <b>Cases</b>                                            | 2                    | 2                    | 4                    | 3                    | 3                    | 6                    |
| <b>Incidence (per 100,000)<br/>(95% CI<sup>†</sup>)</b> | 2.21<br>(0.61, 8.06) | 2.26<br>(0.62, 8.26) | 2.24<br>(0.87, 5.75) | 2.97<br>(1.01, 8.74) | 2.97<br>(1.01, 8.74) | 2.97<br>(1.36, 6.49) |

|                                                         | Clinical Type 2 DM     |                         |                         |                         |                         |                         |                         |                         |                         |
|---------------------------------------------------------|------------------------|-------------------------|-------------------------|-------------------------|-------------------------|-------------------------|-------------------------|-------------------------|-------------------------|
|                                                         | 10-14 years            |                         |                         | 15-19 years             |                         |                         | 10-19 years             |                         |                         |
|                                                         | M                      | F                       | All                     | M                       | F                       | All                     | M                       | F                       | All                     |
| <b>Denominator</b>                                      | 51587                  | 51106                   | 102693                  | 49357                   | 49790                   | 99147                   | 100944                  | 100896                  | 201840                  |
| <b>Cases</b>                                            | 6                      | 15                      | 21                      | 16                      | 19                      | 35                      | 22                      | 34                      | 56                      |
| <b>Incidence (per 100,000)<br/>(95% CI<sup>†</sup>)</b> | 11.63<br>(5.33, 25.38) | 29.35<br>(17.79, 48.43) | 20.45<br>(13.38, 31.26) | 32.42<br>(19.96, 52.66) | 38.16<br>(24.43, 59.60) | 35.30<br>(25.38, 49.09) | 21.79<br>(14.39, 33.00) | 33.70<br>(24.12, 47.08) | 27.74<br>(21.37, 36.02) |

\* 0 cases of T2DM in youth under age 10yrs.

<sup>±</sup>Age is at the time of diagnosis

<sup>†</sup>Confidence Intervals calculated using an inverted score test from the binomial distribution
